# Supplementary material for: The Study on the hERG Blocker Prediction Using Chemical Fingerprint Analysis
Source: MDPI journal article supplement (doi:10.3390/molecules25112615), 2020-06-04
Supplement: s1 [file s1]

## SUPPLEMENTARY DATA

### **The Study on the hERG Blocker Prediction**

### **Using Chemical Fingerprint Analysis**

Kwang-Eun Choi, Anand Balupuri, Nam Sook Kang\*

*Graduate School of New Drug Discovery and Development, Chungnam National University, Daejeon 305-764, Republic of Korea*

**Table S1.** Models built using integer type fingerprints.

| Algorithm           | Score | Control           | PP (integer type FP) |        |        |        |        |        |
|---------------------|-------|-------------------|----------------------|--------|--------|--------|--------|--------|
|                     |       | (no fingerprints) | ECFP_2               | FCFP_2 | ECFP_4 | FCFP_4 | ECFP_6 | FCFP_6 |
| NB-DS               | Q     | 0.71              | 0.80                 | 0.76   | 0.85   | 0.83   | 0.86   | 0.86   |
|                     | AUC   | 0.79              | 0.88                 | 0.84   | 0.91   | 0.90   | 0.92   | 0.92   |
| NB-R                | Q     | 0.73              | 0.81                 | 0.79   | 0.86   | 0.83   | 0.88   | 0.87   |
|                     | AUC   | 0.75              | 0.87                 | 0.82   | 0.91   | 0.89   | 0.92   | 0.92   |
| SVM<br>(linear)     | Q     | 0.78              | 0.86                 | 0.84   | 0.88   | 0.85   | 0.89   | 0.89   |
|                     | AUC   | 0.80              | 0.88                 | 0.88   | 0.92   | 0.87   | 0.93   | 0.93   |
| SVM<br>(polynomial) | Q     | 0.78              | 0.82                 | 0.83   | 0.81   | 0.82   | 0.82   | 0.81   |
|                     | AUC   | 0.82              | 0.89                 | 0.89   | 0.89   | 0.89   | 0.90   | 0.90   |
| SVM<br>(radial)     | Q     | 0.82              | 0.88                 | 0.88   | 0.88   | 0.88   | 0.87   | 0.88   |
|                     | AUC   | 0.85              | 0.92                 | 0.92   | 0.93   | 0.93   | 0.93   | 0.94   |
| RF<br>(100 trees)   | Q     | 0.86              | 0.90                 | 0.91   | 0.90   | 0.91   | 0.89   | 0.90   |
|                     | AUC   | 0.90              | 0.95                 | 0.95   | 0.94   | 0.94   | 0.95   | 0.94   |
| Bagging-DS          | Q     | 0.80              | 0.86                 | 0.87   | 0.86   | 0.87   | 0.87   | 0.87   |

|             |     |      |      |      |      |      |      |      |
|-------------|-----|------|------|------|------|------|------|------|
| (100 trees) | AUC | 0.87 | 0.92 | 0.92 | 0.92 | 0.92 | 0.92 | 0.92 |
| ANN         | Q   | 0.81 | 0.87 | 0.88 | 0.89 | 0.87 | 0.83 | 0.85 |
| (100 size)  | AUC | 0.86 | 0.93 | 0.93 | 0.93 | 0.94 | 0.94 | 0.93 |
| ANN         | Q   | 0.73 | 0.88 | 0.88 | 0.86 | 0.90 | 0.88 | 0.89 |
| (200 size)  | AUC | 0.79 | 0.93 | 0.94 | 0.94 | 0.93 | 0.93 | 0.93 |
| ANN         | Q   | 0.72 | 0.89 | 0.90 | 0.89 | 0.89 | 0.89 | 0.90 |
| (400 size)  | AUC | 0.79 | 0.93 | 0.94 | 0.94 | 0.93 | 0.93 | 0.93 |

Note- Q: predictive accuracy; AUC: area under the receiver operating characteristic curve.

**Table S2.** Models built using binary type fingerprints.

| Algorithm           | Score | Control<br>(no<br>fingerprints) | Converted PP (binary) |        |        |        |        |        | CDK (binary) |          |       |
|---------------------|-------|---------------------------------|-----------------------|--------|--------|--------|--------|--------|--------------|----------|-------|
|                     |       |                                 | ECFP_2                | FCFP_2 | ECFP_4 | FCFP_4 | ECFP_6 | FCFP_6 | Standard     | Extended | Graph |
| NB-R                | Q     | 0.73                            | 0.74                  | 0.74   | 0.75   | 0.75   | 0.74   | 0.74   | 0.76         | 0.75     | 0.70  |
|                     | AUC   | 0.75                            | 0.76                  | 0.75   | 0.75   | 0.76   | 0.75   | 0.75   | 0.81         | 0.8      | 0.76  |
| SVM<br>(linear)     | Q     | 0.78                            | 0.79                  | 0.78   | 0.80   | 0.78   | 0.79   | 0.77   | 0.87         | 0.87     | 0.86  |
|                     | AUC   | 0.80                            | 0.81                  | 0.80   | 0.79   | 0.80   | 0.79   | 0.79   | 0.91         | 0.90     | 0.88  |
| SVM<br>(polynomial) | Q     | 0.78                            | 0.76                  | 0.71   | 0.75   | 0.67   | 0.76   | 0.73   | 0.84         | 0.84     | 0.81  |
|                     | AUC   | 0.82                            | 0.75                  | 0.72   | 0.70   | 0.67   | 0.72   | 0.72   | 0.87         | 0.86     | 0.84  |
| SVM<br>(radial)     | Q     | 0.82                            | 0.75                  | 0.76   | 0.75   | 0.75   | 0.76   | 0.75   | 0.84         | 0.83     | 0.81  |
|                     | AUC   | 0.85                            | 0.77                  | 0.77   | 0.77   | 0.78   | 0.77   | 0.78   | 0.87         | 0.88     | 0.83  |
| RF<br>(100 trees)   | Q     | 0.86                            | 0.72                  | 0.72   | 0.74   | 0.73   | 0.78   | 0.76   | 0.90         | 0.90     | 0.90  |
|                     | AUC   | 0.90                            | 0.83                  | 0.78   | 0.85   | 0.83   | 0.85   | 0.84   | 0.95         | 0.95     | 0.94  |
| ANN<br>(100 size)   | Q     | 0.81                            | 0.82                  | 0.84   | 0.80   | 0.79   | 0.80   | 0.78   | 0.89         | 0.90     | 0.88  |
|                     | AUC   | 0.86                            | 0.83                  | 0.88   | 0.82   | 0.83   | 0.82   | 0.82   | 0.95         | 0.94     | 0.92  |
| ANN<br>(200 size)   | Q     | 0.73                            | 0.83                  | 0.83   | 0.82   | 0.81   | 0.82   | 0.80   | 0.91         | 0.90     | 0.88  |
|                     | AUC   | 0.79                            | 0.86                  | 0.88   | 0.84   | 0.85   | 0.81   | 0.83   | 0.95         | 0.94     | 0.92  |
| ANN<br>(400 size)   | Q     | 0.72                            | 0.83                  | 0.83   | 0.82   | 0.81   | 0.81   | 0.81   | 0.89         | 0.89     | 0.89  |
|                     | AUC   | 0.79                            | 0.86                  | 0.88   | 0.84   | 0.86   | 0.82   | 0.84   | 0.94         | 0.94     | 0.92  |

Note- Q: predictive accuracy; AUC: area under the receiver operating characteristic curve.

**Table S3.** Model prediction for external set-1 using integer type fingerprints.

| Algorithm           | Parameter | Control<br>(No<br>fingerprints) | PP (integer type FP) |        |        |        |        |        |
|---------------------|-----------|---------------------------------|----------------------|--------|--------|--------|--------|--------|
|                     |           |                                 | ECFP_2               | FCFP_2 | ECFP_4 | FCFP_4 | ECFP_6 | FCFP_6 |
| NB-DS               | Q         | 0.69                            | 0.80                 | 0.73   | 0.86   | 0.83   | 0.86   | 0.88   |
|                     | TN        | 134                             | 162                  | 147    | 174    | 167    | 173    | 178    |
|                     | FN        | 20                              | 18                   | 22     | 14     | 16     | 15     | 14     |
|                     | FP        | 62                              | 34                   | 49     | 22     | 29     | 23     | 18     |
|                     | TP        | 47                              | 49                   | 45     | 53     | 51     | 52     | 53     |
| NB-R                | Q         | 0.74                            | 0.81                 | 0.80   | 0.87   | 0.85   | 0.89   | 0.88   |
|                     | TN        | 166                             | 166                  | 166    | 179    | 172    | 183    | 181    |
|                     | FN        | 38                              | 19                   | 23     | 16     | 16     | 17     | 17     |
|                     | FP        | 30                              | 30                   | 30     | 17     | 24     | 13     | 15     |
|                     | TP        | 29                              | 48                   | 44     | 51     | 51     | 50     | 50     |
| SVM<br>(linear)     | Q         | 0.80                            | 0.86                 | 0.86   | 0.88   | 0.88   | 0.88   | 0.88   |
|                     | TN        | 184                             | 186                  | 185    | 185    | 184    | 184    | 185    |
|                     | FN        | 40                              | 28                   | 25     | 20     | 20     | 20     | 20     |
|                     | FP        | 12                              | 10                   | 11     | 11     | 12     | 12     | 11     |
|                     | TP        | 27                              | 39                   | 42     | 47     | 47     | 47     | 47     |
| SVM<br>(polynomial) | Q         | 0.78                            | 0.82                 | 0.81   | 0.83   | 0.84   | 0.84   | 0.82   |
|                     | TN        | 192                             | 186                  | 185    | 180    | 183    | 184    | 182    |
|                     | FN        | 54                              | 37                   | 38     | 28     | 29     | 31     | 33     |
|                     | FP        | 4                               | 10                   | 11     | 16     | 13     | 12     | 14     |
|                     | TP        | 13                              | 30                   | 29     | 39     | 38     | 36     | 34     |
| SVM<br>(radial)     | Q         | 0.83                            | 0.89                 | 0.88   | 0.88   | 0.88   | 0.87   | 0.89   |
|                     | TN        | 181                             | 189                  | 185    | 184    | 188    | 179    | 185    |
|                     | FN        | 30                              | 22                   | 20     | 20     | 23     | 16     | 18     |
|                     | FP        | 15                              | 7                    | 11     | 12     | 8      | 17     | 11     |
|                     | TP        | 37                              | 45                   | 47     | 47     | 44     | 51     | 49     |
| RF                  | Q         | 0.86                            | 0.89                 | 0.90   | 0.90   | 0.90   | 0.89   | 0.88   |

|                           |    |      |      |      |      |      |      |      |
|---------------------------|----|------|------|------|------|------|------|------|
| (100 trees)               | TN | 186  | 194  | 194  | 193  | 193  | 192  | 190  |
|                           | FN | 27   | 27   | 25   | 24   | 24   | 26   | 25   |
|                           | FP | 10   | 2    | 2    | 3    | 3    | 4    | 6    |
|                           | TP | 40   | 40   | 42   | 43   | 43   | 41   | 42   |
| Bagging-DS<br>(100 trees) | Q  | 0.80 | 0.83 | 0.86 | 0.83 | 0.86 | 0.83 | 0.87 |
|                           | TN | 165  | 172  | 178  | 172  | 177  | 172  | 180  |
|                           | FN | 21   | 21   | 20   | 20   | 19   | 20   | 18   |
|                           | FP | 31   | 24   | 18   | 24   | 19   | 24   | 16   |
|                           | TP | 46   | 46   | 47   | 47   | 48   | 47   | 49   |
| ANN<br>(100 size)         | Q  | 0.85 | 0.87 | 0.89 | 0.87 | 0.88 | 0.83 | 0.86 |
|                           | TN | 178  | 179  | 182  | 183  | 180  | 159  | 170  |
|                           | FN | 21   | 18   | 15   | 21   | 16   | 9    | 12   |
|                           | FP | 18   | 17   | 14   | 13   | 16   | 37   | 26   |
|                           | TP | 46   | 49   | 52   | 46   | 51   | 58   | 55   |
| ANN<br>(200 size)         | Q  | 0.77 | 0.89 | 0.90 | 0.87 | 0.89 | 0.88 | 0.89 |
|                           | TN | 154  | 183  | 185  | 174  | 187  | 182  | 180  |
|                           | FN | 18   | 15   | 14   | 12   | 21   | 17   | 14   |
|                           | FP | 42   | 13   | 11   | 22   | 9    | 14   | 16   |
|                           | TP | 49   | 52   | 53   | 55   | 46   | 50   | 53   |
| ANN<br>(400 size)         | Q  | 0.71 | 0.90 | 0.87 | 0.89 | 0.88 | 0.89 | 0.90 |
|                           | TN | 138  | 186  | 178  | 183  | 179  | 187  | 186  |
|                           | FN | 17   | 17   | 16   | 17   | 14   | 21   | 15   |
|                           | FP | 58   | 10   | 18   | 13   | 17   | 9    | 10   |
|                           | TP | 50   | 50   | 51   | 50   | 53   | 46   | 52   |

Note- Q: predictive accuracy; TP: true positive; TN: true negative; FP: false positive; FN: false negative.

**Table S4.** Model prediction for external set-1 using binary type fingerprints.

| Algorithm           | Parameter | Control<br>(No fingerprints) | Converted PP (binary) |        |        |        |        |        | CDK (binary) |          |       |
|---------------------|-----------|------------------------------|-----------------------|--------|--------|--------|--------|--------|--------------|----------|-------|
|                     |           |                              | ECFP_2                | FCFP_2 | ECFP_4 | FCFP_4 | ECFP_6 | FCFP_6 | Standard     | Extended | Graph |
| NB-R                | Q         | 0.74                         | 0.74                  | 0.74   | 0.76   | 0.76   | 0.76   | 0.76   | 0.77         | 0.78     | 0.73  |
|                     | TN        | 166                          | 161                   | 166    | 166    | 169    | 168    | 168    | 159          | 160      | 148   |
|                     | FN        | 38                           | 34                    | 39     | 33     | 35     | 34     | 35     | 24           | 22       | 23    |
|                     | FP        | 30                           | 35                    | 30     | 30     | 27     | 28     | 28     | 37           | 36       | 48    |
|                     | TP        | 29                           | 33                    | 28     | 34     | 32     | 33     | 32     | 43           | 45       | 44    |
| SVM<br>(linear)     | Q         | 0.80                         | 0.81                  | 0.80   | 0.80   | 0.81   | 0.79   | 0.79   | 0.87         | 0.85     | 0.83  |
|                     | TN        | 184                          | 182                   | 182    | 180    | 182    | 182    | 181    | 183          | 179      | 179   |
|                     | FN        | 40                           | 37                    | 38     | 36     | 37     | 40     | 40     | 20           | 23       | 28    |
|                     | FP        | 12                           | 14                    | 14     | 16     | 14     | 14     | 15     | 13           | 17       | 17    |
|                     | TP        | 27                           | 30                    | 29     | 31     | 30     | 27     | 27     | 47           | 44       | 39    |
| SVM<br>(polynomial) | Q         | 0.78                         | 0.75                  | 0.72   | 0.75   | 0.74   | 0.76   | 0.75   | 0.83         | 0.80     | 0.80  |
|                     | TN        | 192                          | 184                   | 187    | 185    | 162    | 191    | 196    | 178          | 175      | 189   |
|                     | FN        | 54                           | 54                    | 64     | 54     | 35     | 57     | 65     | 28           | 32       | 45    |
|                     | FP        | 4                            | 12                    | 9      | 11     | 34     | 5      | 0      | 18           | 21       | 7     |
|                     | TP        | 13                           | 13                    | 3      | 13     | 32     | 10     | 2      | 39           | 35       | 22    |
| SVM<br>(radial)     | Q         | 0.83                         | 0.77                  | 0.78   | 0.77   | 0.78   | 0.78   | 0.79   | 0.86         | 0.85     | 0.84  |
|                     | TN        | 181                          | 180                   | 181    | 179    | 181    | 179    | 181    | 184          | 182      | 183   |
|                     | FN        | 30                           | 45                    | 43     | 44     | 42     | 41     | 41     | 26           | 25       | 30    |
|                     | FP        | 15                           | 16                    | 15     | 17     | 15     | 17     | 15     | 12           | 14       | 13    |
|                     | TP        | 37                           | 22                    | 24     | 23     | 25     | 26     | 26     | 41           | 42       | 37    |
| RF<br>(100 trees)   | Q         | 0.86                         | 0.75                  | 0.75   | 0.78   | 0.76   | 0.79   | 0.78   | 0.89         | 0.88     | 0.88  |
|                     | TN        | 186                          | 196                   | 196    | 196    | 196    | 196    | 196    | 191          | 189      | 191   |
|                     | FN        | 27                           | 67                    | 67     | 59     | 63     | 54     | 59     | 25           | 24       | 27    |

|                   |    |      |      |      |      |      |      |      |      |      |      |
|-------------------|----|------|------|------|------|------|------|------|------|------|------|
|                   | FP | 10   | 0    | 0    | 0    | 0    | 0    | 0    | 5    | 7    | 5    |
|                   | TP | 40   | 0    | 0    | 8    | 4    | 13   | 8    | 42   | 43   | 40   |
| ANN<br>(100 size) | Q  | 0.85 | 0.83 | 0.87 | 0.83 | 0.77 | 0.84 | 0.80 | 0.90 | 0.87 | 0.85 |
|                   | TN | 178  | 178  | 184  | 180  | 169  | 186  | 176  | 187  | 182  | 174  |
|                   | FN | 21   | 27   | 21   | 30   | 33   | 31   | 33   | 16   | 19   | 18   |
|                   | FP | 18   | 18   | 12   | 16   | 27   | 10   | 20   | 9    | 14   | 22   |
|                   | TP | 46   | 40   | 46   | 37   | 34   | 36   | 34   | 51   | 48   | 49   |
| ANN<br>(200 size) | Q  | 0.77 | 0.83 | 0.82 | 0.82 | 0.79 | 0.82 | 0.82 | 0.90 | 0.90 | 0.86 |
|                   | TN | 154  | 182  | 170  | 179  | 172  | 186  | 176  | 191  | 189  | 183  |
|                   | FN | 18   | 30   | 22   | 31   | 32   | 38   | 27   | 20   | 20   | 24   |
|                   | FP | 42   | 14   | 26   | 17   | 24   | 10   | 20   | 5    | 7    | 13   |
|                   | TP | 49   | 37   | 45   | 36   | 35   | 29   | 40   | 47   | 47   | 43   |
| ANN<br>(400 size) | Q  | 0.71 | 0.85 | 0.81 | 0.80 | 0.79 | 0.82 | 0.82 | 0.89 | 0.89 | 0.85 |
|                   | TN | 138  | 181  | 168  | 172  | 172  | 181  | 181  | 184  | 183  | 180  |
|                   | FN | 17   | 25   | 23   | 28   | 31   | 32   | 33   | 18   | 17   | 23   |
|                   | FP | 58   | 15   | 28   | 24   | 24   | 15   | 15   | 12   | 13   | 16   |
|                   | TP | 50   | 42   | 44   | 39   | 36   | 35   | 34   | 49   | 50   | 44   |

Note- Q: predictive accuracy; TP: true positive; TN: true negative; FP: false positive; FN: false negative.



**Table S5.** Model prediction for external set-2 using integer type fingerprints.

| Algorithm           | Parameter | Control<br>(no<br>fingerprints) | PP (integer type FP) |        |        |        |        |        |
|---------------------|-----------|---------------------------------|----------------------|--------|--------|--------|--------|--------|
|                     |           |                                 | ECFP_2               | FCFP_2 | ECFP_4 | FCFP_4 | ECFP_6 | FCFP_6 |
| NB-DS               | Q         | 0.85                            | 0.85                 | 0.85   | 0.79   | 0.81   | 0.77   | 0.79   |
|                     | TN        | 28                              | 29                   | 29     | 29     | 29     | 29     | 29     |
|                     | FN        | 6                               | 7                    | 7      | 10     | 9      | 11     | 10     |
|                     | FP        | 1                               | 0                    | 0      | 0      | 0      | 0      | 0      |
|                     | TP        | 12                              | 11                   | 11     | 8      | 9      | 7      | 8      |
| NB-R                | Q         | 0.81                            | 0.83                 | 0.83   | 0.77   | 0.81   | 0.77   | 0.77   |
|                     | TN        | 29                              | 29                   | 29     | 29     | 29     | 29     | 29     |
|                     | FN        | 9                               | 8                    | 8      | 11     | 9      | 11     | 11     |
|                     | FP        | 0                               | 0                    | 0      | 0      | 0      | 0      | 0      |
|                     | TP        | 9                               | 10                   | 10     | 7      | 9      | 7      | 7      |
| SVM<br>(linear)     | Q         | 0.74                            | 0.74                 | 0.77   | 0.79   | 0.81   | 0.77   | 0.77   |
|                     | TN        | 26                              | 26                   | 28     | 29     | 29     | 29     | 29     |
|                     | FN        | 9                               | 9                    | 10     | 10     | 9      | 11     | 11     |
|                     | FP        | 3                               | 3                    | 1      | 0      | 0      | 0      | 0      |
|                     | TP        | 9                               | 9                    | 8      | 8      | 9      | 7      | 7      |
| SVM<br>(polynomial) | Q         | 0.77                            | 0.74                 | 0.68   | 0.72   | 0.72   | 0.77   | 0.74   |
|                     | TN        | 29                              | 28                   | 29     | 29     | 29     | 29     | 29     |
|                     | FN        | 11                              | 11                   | 15     | 13     | 13     | 11     | 12     |
|                     | FP        | 0                               | 1                    | 0      | 0      | 0      | 0      | 0      |
|                     | TP        | 7                               | 7                    | 3      | 5      | 5      | 7      | 6      |
| SVM<br>(radial)     | Q         | 0.79                            | 0.79                 | 0.85   | 0.81   | 0.77   | 0.83   | 0.79   |
|                     | TN        | 29                              | 29                   | 29     | 29     | 29     | 29     | 29     |
|                     | FN        | 10                              | 10                   | 7      | 9      | 11     | 8      | 10     |
|                     | FP        | 0                               | 0                    | 0      | 0      | 0      | 0      | 0      |
|                     | TP        | 8                               | 8                    | 11     | 9      | 7      | 10     | 8      |
| RF<br>(100 trees)   | Q         | 0.77                            | 0.81                 | 0.81   | 0.79   | 0.79   | 0.77   | 0.77   |
|                     | TN        | 29                              | 29                   | 29     | 29     | 29     | 29     | 29     |
|                     | FN        | 11                              | 9                    | 9      | 10     | 10     | 11     | 11     |

|                           |    |      |      |      |      |      |      |      |
|---------------------------|----|------|------|------|------|------|------|------|
|                           | FP | 0    | 0    | 0    | 0    | 0    | 0    | 0    |
|                           | TP | 7    | 9    | 9    | 8    | 8    | 7    | 7    |
| Bagging-DS<br>(100 trees) | Q  | 0.83 | 0.89 | 0.83 | 0.89 | 0.87 | 0.87 | 0.87 |
|                           | TN | 28   | 29   | 29   | 29   | 29   | 29   | 29   |
|                           | FN | 7    | 5    | 8    | 5    | 6    | 6    | 6    |
|                           | FP | 1    | 0    | 0    | 0    | 0    | 0    | 0    |
|                           | TP | 11   | 13   | 10   | 13   | 12   | 12   | 12   |
| ANN<br>(100 size)         | Q  | 0.85 | 0.83 | 0.81 | 0.77 | 0.81 | 0.85 | 0.83 |
|                           | TN | 29   | 29   | 29   | 29   | 29   | 24   | 27   |
|                           | FN | 7    | 8    | 9    | 11   | 9    | 2    | 6    |
|                           | FP | 0    | 0    | 0    | 0    | 0    | 5    | 2    |
|                           | TP | 11   | 10   | 9    | 7    | 9    | 16   | 12   |
| ANN<br>(200 size)         | Q  | 0.74 | 0.79 | 0.79 | 0.79 | 0.81 | 0.81 | 0.79 |
|                           | TN | 23   | 28   | 29   | 28   | 29   | 29   | 29   |
|                           | FN | 6    | 9    | 10   | 9    | 9    | 9    | 10   |
|                           | FP | 6    | 1    | 0    | 1    | 0    | 0    | 0    |
|                           | TP | 12   | 9    | 8    | 9    | 9    | 9    | 8    |
| ANN<br>(400 size)         | Q  | 0.60 | 0.79 | 0.74 | 0.77 | 0.83 | 0.79 | 0.79 |
|                           | TN | 16   | 29   | 28   | 29   | 29   | 29   | 29   |
|                           | FN | 6    | 10   | 11   | 11   | 8    | 10   | 10   |
|                           | FP | 13   | 0    | 1    | 0    | 0    | 0    | 0    |
|                           | TP | 12   | 8    | 7    | 7    | 10   | 8    | 8    |

Note- Q: predictive accuracy; TP: true positive; TN: true negative; FP: false positive; FN: false negative.

**Table S6.** Model prediction for external set-2 using binary type fingerprints.

[illegible]

|                   |    |      |      |      |      |      |      |      |      |      |      |
|-------------------|----|------|------|------|------|------|------|------|------|------|------|
|                   | FN | 11   | 18   | 18   | 18   | 18   | 18   | 18   | 12   | 11   | 14   |
|                   | FP | 0    | 0    | 0    | 0    | 0    | 0    | 0    | 0    | 0    | 0    |
|                   | TP | 7    | 0    | 0    | 0    | 0    | 0    | 0    | 6    | 7    | 4    |
| ANN<br>(100 size) | Q  | 0.85 | 0.74 | 0.55 | 0.79 | 0.64 | 0.72 | 0.53 | 0.79 | 0.79 | 0.53 |
|                   | TN | 29   | 25   | 18   | 28   | 18   | 26   | 16   | 28   | 28   | 13   |
|                   | FN | 7    | 8    | 10   | 9    | 6    | 10   | 9    | 9    | 9    | 6    |
|                   | FP | 0    | 4    | 11   | 1    | 11   | 3    | 13   | 1    | 1    | 16   |
|                   | TP | 11   | 10   | 8    | 9    | 12   | 8    | 9    | 9    | 9    | 12   |
| ANN<br>(200 size) | Q  | 0.74 | 0.83 | 0.64 | 0.81 | 0.62 | 0.74 | 0.66 | 0.83 | 0.81 | 0.36 |
|                   | TN | 23   | 27   | 20   | 28   | 20   | 27   | 21   | 29   | 29   | 8    |
|                   | FN | 6    | 6    | 8    | 8    | 9    | 10   | 8    | 8    | 9    | 9    |
|                   | FP | 6    | 2    | 9    | 1    | 9    | 2    | 8    | 0    | 0    | 21   |
|                   | TP | 12   | 12   | 10   | 10   | 9    | 8    | 10   | 10   | 9    | 9    |
| ANN<br>(400 size) | Q  | 0.60 | 0.83 | 0.66 | 0.77 | 0.64 | 0.74 | 0.62 | 0.81 | 0.83 | 0.38 |
|                   | TN | 16   | 26   | 20   | 27   | 20   | 24   | 18   | 29   | 28   | 8    |
|                   | FN | 6    | 5    | 7    | 9    | 8    | 7    | 7    | 9    | 7    | 8    |
|                   | FP | 13   | 3    | 9    | 2    | 9    | 5    | 11   | 0    | 1    | 21   |
|                   | TP | 12   | 13   | 11   | 9    | 10   | 11   | 11   | 9    | 11   | 10   |

Note- Q: predictive accuracy; TP: true positive; TN: true negative; FP: false positive; FN: false negative.
